# Supplementary material for: BPA and its analogues in thermal papers: an assessment of presence and dermal exposure
Source: Royal Society of Chemistry journal article supplement (doi:10.1039/d4va00132j), 2025-01-01
Supplement: d4va00132j1.pdf [file d4va00132j1.pdf]

## **BPA and its Analogues in Thermal Papers: An Assessment of Presence and Dermal Exposure**

**Merve Ozkaleli Akcetin<sup>1</sup>, Hatice Kubra Gul<sup>1</sup>, Ismail Ethem Goren<sup>2</sup>, Nebile Daglioglu<sup>2</sup>,  
Perihan Binnur Kurt-Karakus<sup>1,\*</sup>**

<sup>1</sup>Department of Environmental Engineering, Faculty of Engineering and Natural Sciences, Bursa Technical University, 16310, Bursa, Türkiye

<sup>2</sup>Institute of Forensic Sciences, Department of Forensic Toxicology, Ankara University, Ankara, Türkiye

\*Correspondence to: Perihan Binnur KURT KARAKUŞ, Bursa Technical University Department of Environmental Engineering, Faculty of Engineering and Natural Sciences, Mimarsinan Mah. Mimarsinan Bulvarı, Eflak Cad. No:177 Yıldırım/Bursa, Türkiye. E-mail: [perihan.kurt@btu.edu.tr](mailto:perihan.kurt@btu.edu.tr); ORCID: 0000-0001-6737-3475.

# **Supporting Information**

**Table S1.** Details of the PCs m/z ratios and retention time

| Analyte                                    | Precursor ions | Product ions | Ret. Time (min.) |
|--------------------------------------------|----------------|--------------|------------------|
| Bisphenol A                                | 227.0          | 212.10       | 1.803            |
|                                            |                | 133.00       |                  |
| Bisphenol AF                               | 335.05         | 265.05       | 1.889            |
|                                            | 334.95         | 68.90        |                  |
| Bisphenol Z                                | 267.05         | 173.10       | 2.091            |
|                                            |                | 145.00       |                  |
| Bisphenol F                                | 199.00         | 92.90        | 1.649            |
|                                            |                | 76.80        |                  |
| Bisphenol B                                | 241.10         | 211.00       | 1.801            |
|                                            |                | 93.00        |                  |
| Bisphenol P                                | 345.10         | 133.10       | 2.485            |
|                                            |                | 315.00       |                  |
| Bisphenol S                                | 249.00         | 107.90       | 1.420            |
|                                            |                | 92.00        |                  |
| Bisphenol A-d16                            | 241.30         | 147.00       | 1.777            |
|                                            |                | 142.10       |                  |
| Bisphenol A- <sup>13</sup> C <sub>12</sub> | 227.00         | 113.00       | 0.942            |
|                                            |                | 180.95       |                  |
|                                            |                | 85.10        |                  |

**Table S2.** Parameters used in calculation of EDI by means of deterministic and probabilistic approach

| Parameter | Unit      | Literature Reported Values |                   |                    |                 | Deterministic Calculation                                                                                                                                      | Probabilistic Calculation                              |
|-----------|-----------|----------------------------|-------------------|--------------------|-----------------|----------------------------------------------------------------------------------------------------------------------------------------------------------------|--------------------------------------------------------|
|           |           |                            |                   |                    |                 | <i>Value Used in Calculation</i>                                                                                                                               | <i>Range used in Calculation</i>                       |
| C         | µg/g      | - <sup>a</sup>             | - <sup>a</sup>    | - <sup>a</sup>     | - <sup>a</sup>  | Min., max., median, mean, 5 <sup>th</sup> , 25 <sup>th</sup> , 75 <sup>th</sup> and 95 <sup>th</sup> percentile concentrations determined in the current study | Min-Max concentrations determined in the current study |
| k         | ng/sec    | 1072 <sup>1</sup>          | 1838 <sup>1</sup> | 21522 <sup>2</sup> | -               | 21522                                                                                                                                                          | 1072-21522                                             |
| AF        | %         | 2.3 <sup>3</sup>           | 8.6 <sup>3</sup>  | 27 <sup>2</sup>    | 46 <sup>4</sup> | 27                                                                                                                                                             | 2.3-46                                                 |
| HF        | times/day | 3 <sup>*,5</sup>           | 96 <sup>**6</sup> | 150 <sup>**5</sup> | -               | 3 <sup>*,150<sup>**</sup></sup>                                                                                                                                | 3 <sup>*</sup> ; 96 <sup>**</sup> -150 <sup>**</sup>   |
| HT        | sec       | 5 <sup>7,8</sup>           | 10 <sup>6-8</sup> | -                  | -               | 5                                                                                                                                                              | 5-10                                                   |
| BW        | kg        | 60 <sup>9</sup>            | 70 <sup>9</sup>   | -                  | -               | 70                                                                                                                                                             | 60-70                                                  |

<sup>a</sup>This study; <sup>\*</sup>for general public exposure; <sup>\*\*</sup>for occupational exposure; <sup>1</sup>; <sup>2</sup>; <sup>3</sup>; <sup>4</sup>; <sup>5</sup>; <sup>6</sup>; <sup>7</sup>; <sup>8</sup>; <sup>9</sup>

**Table S3.** Parameters used in calculation of RfDdermal, HQ and HI

| Parameter             | Unit         | BP-A                 | BP-B                  | BP-S                    | BP-Z                  | BP-F                  | BP-P                  |
|-----------------------|--------------|----------------------|-----------------------|-------------------------|-----------------------|-----------------------|-----------------------|
| RfD <sub>oral</sub>   | µg/kg bw/day | 50 <sup>10</sup>     | 0.0002 <sup>11</sup>  | 0,0002 <sup>11</sup>    | 0.0002 <sup>11</sup>  | 0.0002 <sup>11</sup>  | 0.0002 <sup>11</sup>  |
| RfD <sub>dermal</sub> | µg/kg bw/day | 5 <sup>12</sup>      | 0.00002 <sup>12</sup> | 0.0001148 <sup>12</sup> | 0.00002 <sup>12</sup> | 0.00002 <sup>12</sup> | 0.00002 <sup>12</sup> |
| ABSGI                 | %            | 10 <sup>13, 14</sup> | 10 <sup>13, 14</sup>  | 57.4 <sup>15</sup>      | 10 <sup>13, 14</sup>  | 10 <sup>13, 14</sup>  | 10 <sup>13, 14</sup>  |

<sup>10, 11</sup> Calculated using formula given <sup>12</sup>; <sup>13</sup>; <sup>14</sup>; <sup>15</sup>

**Table S4.** Details of thermal paper receipts PCs concentrations levels ( $\mu\text{g/g}$ ) detected in samples collected from Turkish market

| <b>Sample Number</b> | <b>BPA</b> | <b>BPB</b> | <b>BPS</b> | <b>BPZ</b> | <b>BPAF</b> | <b>BPF</b> | <b>BPP</b> |
|----------------------|------------|------------|------------|------------|-------------|------------|------------|
| 1                    | 2.89       | nd         | 114.93     | nd         | nd          | nd         | nd         |
| 2                    | 514.08     | 27.52      | 0.15       | 0.74       | nd          | nd         | nd         |
| 3                    | 382.22     | 17.68      | 0.18       | nd         | nd          | nd         | nd         |
| 4                    | 3.19       | nd         | 172.94     | nd         | nd          | nd         | nd         |
| 5                    | 3.05       | nd         | 172.80     | nd         | nd          | nd         | nd         |
| 6                    | 381.74     | 11.31      | 0.15       | nd         | nd          | 3.53       | nd         |
| 7                    | 420.07     | 9.98       | 0.35       | nd         | nd          | nd         | nd         |
| 8                    | 434.88     | 13.33      | 0.27       | nd         | nd          | nd         | nd         |
| 9                    | 437.38     | 28.30      | 0.10       | 0.83       | nd          | nd         | nd         |
| 10                   | 406.65     | 15.14      | 0.42       | nd         | nd          | 4.01       | nd         |
| 11                   | 452.20     | 9.76       | 0.43       | nd         | nd          | nd         | nd         |
| 12                   | 417.32     | 13.42      | 0.13       | nd         | nd          | nd         | nd         |
| 13                   | 479.36     | 14.03      | 0.13       | nd         | nd          | nd         | nd         |
| 14                   | 530.14     | 20.57      | 0.13       | 0.84       | nd          | 4.07       | nd         |
| 15                   | 509.98     | 15.50      | 0.10       | 0.84       | nd          | nd         | nd         |
| 16                   | 372.74     | 13.58      | 0.08       | nd         | nd          | 3.70       | nd         |
| 17                   | 418.87     | 16.20      | 0.07       | nd         | nd          | nd         | nd         |
| 18                   | 403.61     | 17.16      | 0.09       | nd         | nd          | 4.23       | nd         |
| 19                   | 445.28     | 13.33      | 0.22       | nd         | nd          | 4.13       | nd         |
| 20                   | 445.95     | 17.48      | 0.12       | 0.81       | nd          | 4.17       | nd         |
| 21                   | 400.11     | 13.47      | 0.12       | 0.75       | nd          | 3.66       | nd         |
| 22                   | 374.48     | 13.48      | 0.19       | nd         | nd          | 4.18       | nd         |
| 23                   | 416.55     | 18.57      | 0.15       | nd         | nd          | nd         | nd         |
| 24                   | 4.36       | nd         | 200.43     | nd         | nd          | nd         | nd         |
| 25                   | 375.92     | 17.85      | 0.37       | 0.86       | nd          | 4.92       | nd         |
| 26                   | 5.04       | nd         | 210.28     | nd         | nd          | nd         | 1.41       |

nd: not detected

**Table S4 (cont'd).** Details of thermal paper receipts PCs concentrations levels ( $\mu\text{g/g}$ ) detected in samples collected from Turkish market

| <b>Sample Number</b> | <b>BPA</b> | <b>BPB</b> | <b>BPS</b> | <b>BPZ</b> | <b>BPAF</b> | <b>BPF</b> | <b>BPP</b> |
|----------------------|------------|------------|------------|------------|-------------|------------|------------|
| 27                   | 417.14     | 16.38      | 0.30       | 0.83       | nd          | nd         | nd         |
| 28                   | 347.22     | 13.31      | 0.50       | nd         | nd          | 4.02       | nd         |
| 29                   | 3.34       | nd         | 196.60     | nd         | nd          | nd         | nd         |
| 30                   | 3.69       | nd         | 191.64     | nd         | nd          | 4.31       | nd         |
| 31                   | 430.44     | nd         | 0.36       | 0.83       | nd          | nd         | nd         |
| 32                   | 3.42       | nd         | 0.37       | nd         | nd          | nd         | nd         |
| 33                   | 4.27       | nd         | 194.61     | nd         | nd          | 4.15       | nd         |
| 34                   | 5.67       | nd         | 207.59     | nd         | nd          | 4.44       | nd         |
| 35                   | 250.12     | 16.17      | 0.19       | 0.81       | nd          | 4.07       | nd         |
| 36                   | 311.13     | 22.20      | 0.29       | 0.80       | nd          | 4.10       | nd         |
| 37                   | 6.90       | nd         | 0.24       | nd         | nd          | nd         | 1.43       |
| 38                   | 414.13     | 18.48      | 0.19       | nd         | nd          | nd         | nd         |
| 39                   | 321.48     | 11.82      | 0.21       | 0.81       | nd          | 4.40       | nd         |
| 40                   | 350.78     | 15.17      | 0.16       | 0.86       | nd          | nd         | nd         |
| 41                   | 3.52       | nd         | 180.35     | nd         | nd          | nd         | nd         |
| 42                   | 3.95       | nd         | 181.79     | nd         | nd          | 4.07       | nd         |
| 43                   | 24.18      | nd         | 1.28       | nd         | nd          | 4.61       | nd         |
| 44                   | 299.93     | 17.64      | 0.32       | nd         | nd          | 4.29       | nd         |
| 45                   | 6.24       | nd         | 0.10       | nd         | nd          | 4.31       | nd         |
| 46                   | 359.69     | 20.22      | 0.17       | 0.84       | nd          | 4.19       | nd         |
| 47                   | 5.49       | nd         | 184.30     | nd         | nd          | 4.06       | nd         |
| 48                   | 331.52     | 13.75      | 0.19       | nd         | nd          | 4.71       | nd         |
| 49                   | 6.57       | nd         | 0.07       | nd         | nd          | nd         | nd         |
| 50                   | 318.08     | 12.70      | 0.47       | nd         | nd          | 3.89       | nd         |
| 51                   | 847.86     | 15.25      | 0.24       | 0.80       | nd          | 4.10       | nd         |
| 52                   | 607.67     | 26.25      | 0.35       | 0.85       | nd          | nd         | 1.34       |

nd: not detected

**Table S4 (cont'd).** Details of thermal paper receipts PCs concentrations levels ( $\mu\text{g/g}$ ) detected in samples collected from Turkish market

| <b>Sample Number</b> | <b>BPA</b> | <b>BPB</b> | <b>BPS</b> | <b>BPZ</b> | <b>BPAF</b> | <b>BPF</b> | <b>BPP</b> |
|----------------------|------------|------------|------------|------------|-------------|------------|------------|
| 53                   | 431.45     | 15.49      | 0.09       | nd         | nd          | 3.79       | nd         |
| 54                   | 473.14     | 32.43      | 0.10       | nd         | nd          | nd         | nd         |
| 55                   | 829.60     | 18.99      | 0.11       | 0.83       | nd          | 4.01       | nd         |
| 56                   | 508.13     | 60.53      | 0.11       | 0.84       | nd          | nd         | nd         |
| 57                   | 349.89     | 31.88      | 0.16       | 0.76       | nd          | 3.71       | nd         |
| 58                   | 1.98       | 43.10      | 64.26      | nd         | nd          | 4.19       | nd         |
| 59                   | 550.70     | 29.56      | 0.19       | nd         | nd          | 3.97       | nd         |
| 60                   | nd         | nd         | 0.08       | 0.78       | nd          | nd         | nd         |
| 61                   | 4.15       | nd         | 190.56     | nd         | nd          | nd         | nd         |
| 62                   | 893.84     | 15.39      | 0.23       | nd         | nd          | nd         | nd         |
| 63                   | 669.63     | 21.10      | 0.18       | 0.85       | nd          | nd         | nd         |
| 64                   | 692.09     | 13.19      | 0.27       | 0.74       | nd          | nd         | nd         |
| 65                   | 3.44       | nd         | 1.23       | nd         | nd          | 3.78       | nd         |
| 66                   | 543.16     | 22.51      | 0.14       | nd         | nd          | nd         | nd         |
| 67                   | 520.34     | 12.61      | 0.08       | 0.80       | nd          | 4.09       | nd         |
| 68                   | 566.06     | 20.80      | 0.15       | 0.75       | nd          | nd         | nd         |
| 69                   | 665.61     | 23.08      | 0.13       | 0.79       | nd          | 3.85       | nd         |
| 70                   | 4.31       | nd         | 192.01     | nd         | nd          | 4.07       | nd         |
| 71                   | 4.25       | nd         | 171.02     | nd         | nd          | nd         | nd         |
| 72                   | 616.83     | 28.73      | 0.15       | 0.84       | nd          | 4.09       | nd         |
| 73                   | 5.16       | nd         | 187.86     | nd         | nd          | nd         | nd         |
| 74                   | 549.34     | 13.56      | 0.16       | 0.75       | nd          | 4.06       | nd         |
| 75                   | 711.72     | 20.79      | 0.49       | 0.86       | nd          | nd         | nd         |
| 76                   | 522.57     | 14.85      | 0.24       | 0.83       | nd          | nd         | nd         |
| 77                   | 663.20     | 15.38      | 0.33       | nd         | nd          | nd         | 1.83       |

nd: not detected

**Table S4 (cont'd).** Details of thermal paper receipts PCs concentrations levels ( $\mu\text{g/g}$ ) detected in samples collected from Turkish market

| <b>Sample Number</b> | <b>BPA</b> | <b>BPB</b> | <b>BPS</b> | <b>BPZ</b> | <b>BPAF</b> | <b>BPF</b> | <b>BPP</b> |
|----------------------|------------|------------|------------|------------|-------------|------------|------------|
| 78                   | 539.84     | 12.02      | 0.23       | 0.83       | nd          | nd         | nd         |
| 79                   | 498.84     | 24.76      | 0.49       | nd         | nd          | 3.95       | nd         |
| 80                   | 5.16       | nd         | 191.39     | nd         | nd          | nd         | nd         |
| 81                   | 5.57       | nd         | 185.39     | nd         | nd          | nd         | nd         |
| 82                   | 1061.11    | 15.52      | 0.80       | nd         | nd          | nd         | nd         |
| 83                   | 682.35     | 17.22      | 0.22       | 0.79       | nd          | 3.83       | nd         |
| 84                   | 461.74     | 34.17      | 0.24       | 0.84       | nd          | nd         | nd         |
| 85                   | 728.24     | 22.71      | 0.21       | 0.82       | nd          | 4.00       | nd         |
| 86                   | 6.28       | nd         | 182.86     | nd         | nd          | nd         | nd         |
| 87                   | 553.47     | 26.19      | 0.23       | nd         | nd          | 4.49       | nd         |
| 88                   | 582.35     | 20.34      | 0.21       | 0.86       | nd          | 4.19       | nd         |
| 89                   | 490.20     | 23.37      | 0.82       | nd         | nd          | nd         | nd         |
| 90                   | 4.28       | nd         | 188.05     | nd         | nd          | 4.16       | nd         |
| 91                   | 351.78     | 25.47      | 0.21       | 0.83       | nd          | 4.15       | nd         |
| 92                   | 352.96     | 39.53      | 0.09       | 0.86       | nd          | 4.31       | nd         |
| 93                   | 391.82     | 42.43      | 0.08       | 0.82       | nd          | 4.22       | nd         |
| 94                   | 323.31     | 61.71      | 0.08       | nd         | nd          | 4.40       | nd         |
| 95                   | 4.08       | nd         | 197.24     | nd         | nd          | nd         | nd         |
| 96                   | 338.90     | 12.17      | 0.21       | 0.81       | nd          | 4.17       | nd         |
| 97                   | 401.55     | 22.39      | 0.28       | 0.81       | nd          | 4.04       | nd         |
| 98                   | 343.05     | 17.78      | 0.23       | 0.80       | nd          | 5.62       | nd         |
| 99                   | 432.29     | 19.89      | 0.15       | 0.81       | nd          | 4.07       | nd         |
| 100                  | 318.92     | 15.71      | 0.12       | nd         | nd          | 4.47       | nd         |
| 101                  | 389.08     | 23.48      | 0.37       | 0.84       | nd          | 4.31       | nd         |
| 102                  | 349.98     | 39.02      | 0.15       | 0.79       | nd          | 3.94       | nd         |

nd: not detected

**Table S4 (cont'd). Details of thermal paper receipts PCs concentrations levels ( $\mu\text{g/g}$ ) detected in samples collected from Turkish market**

| <b>Sample Number</b> | <b>BPA</b> | <b>BPB</b> | <b>BPS</b> | <b>BPZ</b> | <b>BPAF</b> | <b>BPF</b> | <b>BPP</b> |
|----------------------|------------|------------|------------|------------|-------------|------------|------------|
| 103                  | 335.01     | 21.37      | 0.12       | nd         | nd          | 4.20       | nd         |
| 104                  | 389.62     | 33.77      | 0.10       | 0.86       | nd          | 4.53       | nd         |
| 105                  | 494.20     | 29.88      | 0.15       | 0.86       | nd          | 4.20       | nd         |
| 106                  | 353.91     | 15.07      | 0.10       | 0.84       | nd          | 4.34       | nd         |
| 107                  | 355.90     | 18.80      | 0.14       | 0.83       | nd          | 4.28       | nd         |
| 108                  | 437.11     | 20.89      | 0.08       | nd         | nd          | 4.04       | nd         |
| 109                  | 359.79     | 15.09      | 0.08       | 0.85       | nd          | 4.63       | nd         |
| 110                  | 474.63     | 25.37      | 0.18       | 0.84       | nd          | 4.45       | nd         |
| 111                  | 351.78     | 13.02      | 0.11       | nd         | nd          | nd         | nd         |
| 112                  | 435.25     | 22.76      | 0.11       | 0.85       | nd          | 4.26       | nd         |
| 113                  | 349.77     | 16.71      | 0.13       | nd         | nd          | 4.32       | nd         |
| 114                  | 447.65     | 21.49      | 0.13       | 0.83       | nd          | 4.15       | nd         |
| 115                  | 429.12     | 20.11      | 0.16       | nd         | nd          | nd         | nd         |
| 116                  | 379.10     | 16.88      | 0.08       | nd         | nd          | 4.72       | nd         |
| 117                  | 347.39     | 17.65      | 0.11       | 0.83       | nd          | 4.27       | nd         |
| 118                  | 439.28     | 21.86      | 0.09       | 0.87       | nd          | 5.75       | nd         |
| 119                  | 470.01     | 16.85      | 0.20       | 0.79       | nd          | 4.16       | nd         |
| 120                  | 441.47     | 19.37      | 0.10       | 0.84       | nd          | 4.57       | nd         |
| 121                  | 400.61     | 19.18      | 0.10       | 0.79       | nd          | 4.17       | nd         |
| 122                  | 353.84     | 15.73      | 0.08       | nd         | nd          | 4.49       | nd         |
| 123                  | 400.99     | 16.25      | 0.19       | nd         | nd          | 4.59       | nd         |
| 124                  | 499.88     | 23.23      | 0.25       | 0.87       | nd          | 4.37       | nd         |
| 125                  | 384.10     | 17.36      | 0.09       | nd         | nd          | nd         | nd         |
| 126                  | 427.74     | 29.52      | 0.10       | nd         | nd          | nd         | nd         |
| 127                  | 345.43     | 13.76      | 0.13       | 0.80       | nd          | nd         | nd         |

nd: not detected



**Table S4 (cont'd).** Details of thermal paper receipts PCs concentrations levels ( $\mu\text{g/g}$ ) detected in samples collected from Turkish market

| <b>Sample Number</b> | <b>BPA</b> | <b>BPB</b> | <b>BPS</b> | <b>BPZ</b> | <b>BPAF</b> | <b>BPF</b> | <b>BPP</b> |
|----------------------|------------|------------|------------|------------|-------------|------------|------------|
| 128                  | 394.64     | 17.58      | 0.08       | nd         | nd          | 4.25       | nd         |
| 129                  | 401.32     | 13.42      | 0.16       | 0.80       | nd          | 4.77       | nd         |
| 130                  | 379.36     | 15.52      | 0.21       | 0.85       | nd          | 4.24       | nd         |
| 131                  | 371.52     | 27.36      | 0.22       | nd         | nd          | nd         | nd         |
| 132                  | 300.44     | 23.06      | 0.30       | nd         | nd          | 4.44       | nd         |
| 133                  | 30.77      | 3.65       | 167.33     | 0.77       | nd          | 4.21       | nd         |
| 134                  | 359.60     | 26.43      | 0.39       | nd         | nd          | nd         | 1.37       |
| 135                  | 330.19     | 15.10      | 0.64       | nd         | nd          | 4.35       | nd         |
| 136                  | 479.21     | 36.97      | 2.08       | nd         | nd          | 3.93       | nd         |
| 137                  | 495.64     | 34.24      | 0.31       | nd         | nd          | nd         | nd         |
| 138                  | 16.56      | 3.73       | 172.14     | nd         | nd          | nd         | nd         |
| 139                  | 360.78     | 39.11      | 0.20       | nd         | nd          | nd         | nd         |
| 140                  | 410.71     | 29.22      | 0.26       | 0.82       | nd          | 3.97       | nd         |
| 141                  | 292.58     | 51.56      | 0.38       | nd         | nd          | nd         | nd         |
| 142                  | 10.44      | nd         | 189.35     | nd         | nd          | nd         | nd         |
| 143                  | 8.33       | nd         | 208.72     | nd         | nd          | nd         | nd         |
| 144                  | 439.30     | 53.14      | 0.66       | nd         | nd          | 4.08       | nd         |
| 145                  | 373.48     | 49.71      | 0.31       | nd         | nd          | 4.13       | nd         |
| 146                  | 419.40     | 52.16      | 0.29       | nd         | nd          | 4.10       | nd         |
| 147                  | 587.91     | 60.46      | 0.20       | 0.87       | nd          | nd         | nd         |
| 148                  | 517.60     | 58.04      | 0.18       | nd         | nd          | nd         | nd         |
| 149                  | 376.26     | 39.27      | 0.11       | nd         | nd          | nd         | nd         |
| 150                  | 391.47     | 29.47      | 0.22       | 0.84       | nd          | 4.07       | nd         |
| 151                  | 549.80     | 52.04      | 0.21       | nd         | nd          | nd         | nd         |
| 152                  | 451.10     | 46.50      | 0.40       | 0.84       | nd          | 3.95       | nd         |

nd: not detected

**Table S5.** Concentrations of BPs in different thermal paper brands

| Thermal Paper Brands  | Statistic Parameters | BPA    | BPB   | BPS    | BPAF | BPZ  | BPF  | BPP  |
|-----------------------|----------------------|--------|-------|--------|------|------|------|------|
| <b>Brand a (n:8)</b>  | Min                  | 1.98   | 9.76  | 0.10   | nc   | nc   | 3.89 | nc   |
|                       | Max                  | 473.14 | 43.10 | 184.30 |      |      | 4.71 |      |
|                       | Mean                 | 303.43 | 22.10 | 31.25  |      |      | 4.21 |      |
|                       | Median               | 374.42 | 13.75 | 0.31   |      |      | 4.13 |      |
|                       | GeoAvg               | 120.3  | 19.15 | 0.94   |      |      | 4.20 |      |
|                       | SE                   | 68.14  | 4.54  | 23.26  |      |      | 0.12 |      |
|                       | 25 th Percentile     | 239.9  | 13.06 | 0.12   |      |      | 4.02 |      |
|                       | 75 th Percentile     | 433.8  | 30.97 | 16.42  |      |      | 4.32 |      |
| <b>Brand b (n:16)</b> | Min                  | 4.25   | 3.65  | 0.08   | nc   | 0.74 | 4.07 | nc   |
|                       | Max                  | 692.09 | 60.46 | 171.02 |      | 0.87 | 4.45 |      |
|                       | Avg                  | 426.70 | 25.75 | 21.31  |      | 0.81 | 4.22 |      |
|                       | Median               | 470.01 | 20.57 | 0.20   |      | 0.82 | 4.19 |      |
|                       | GeoAvg               | 292.70 | 20.71 | 0.40   |      | 0.81 | 4.22 |      |
|                       | SE                   | 46.65  | 4.22  | 14.43  |      | 0.01 | 0.03 |      |
|                       | 25 th Percentile     | 396.21 | 15.96 | 0.13   |      | 0.78 | 4.15 |      |
|                       | 75 th Percentile     | 536.65 | 29.81 | 0.28   |      | 0.84 | 4.25 |      |
| <b>Brand c (n:5)</b>  | Min                  | 445.95 | 14.03 | 0.10   | nc   | 0.81 | nc   | nc   |
|                       | Max                  | 893.84 | 21.10 | 0.23   |      | 0.85 |      |      |
|                       | Avg                  | 599.75 | 16.70 | 0.15   |      | 0.84 |      |      |
|                       | Median               | 509.98 | 15.50 | 0.13   |      | 0.84 |      |      |
|                       | GeoAvg               | 579.32 | 16.53 | 0.15   |      | 0.83 |      |      |
|                       | SE                   | 82.9   | 1.23  | 0.02   |      | 0.01 |      |      |
|                       | 25 th Percentile     | 479.36 | 15.39 | 0.12   |      | 0.83 |      |      |
|                       | 75 th Percentile     | 486.78 | 25.83 | 0.31   |      | 0.84 |      |      |
| <b>Brand d (n:34)</b> | Min                  | 4.31   | 3.73  | 0.08   | nc   | 0.75 | 3.83 | 1.37 |
|                       | Max                  | 847.86 | 58.04 | 208.72 |      | 0.86 | 4.49 | 1.83 |
|                       | Avg                  | 428.13 | 22.34 | 33.70  |      | 0.82 | 4.15 | 1.60 |
|                       | Median               | 463.25 | 20.34 | 0.23   |      | 0.82 | 4.10 | 1.60 |
|                       | GeoAvg               | 237.66 | 19.89 | 0.72   |      | 0.82 | 4.15 | 1.59 |
|                       | SE                   | 41.0   | 1.96  | 13.61  |      | 0.01 | 0.03 | 0.06 |
|                       | 25 th Percentile     | 350.27 | 15.38 | 0.17   |      | 0.80 | 4.07 | 1.49 |
|                       | 75 th Percentile     | 351.60 | 15.94 | 0.18   |      | 0.80 | 4.07 | 1.50 |
| <b>Brand e (n:23)</b> | Min                  | 4.28   | 13.33 | 0.07   | nc   | 0.75 | 3.66 | nc   |
|                       | Max                  | 439.30 | 53.14 | 188.05 |      | 0.87 | 5.75 |      |
|                       | Avg                  | 373.05 | 20.37 | 8.36   |      | 0.82 | 4.27 |      |
|                       | Median               | 394.64 | 17.61 | 0.12   |      | 0.82 | 4.23 |      |
|                       | GeoAvg               | 318.70 | 19.13 | 0.20   |      | 0.82 | 4.25 |      |
|                       | SE                   | 18.71  | 1.83  | 8.00   |      | 0.01 | 0.10 |      |
|                       | 25 th Percentile     | 350.62 | 15.25 | 0.09   |      | 0.80 | 4.07 |      |
|                       | 75 th Percentile     | 423.99 | 21.74 | 0.24   |      | 0.84 | 4.29 |      |

nc: not calculated as the compound was not found in any of the samples of the relevant brand

**Table S5 (Cont'd).** Concentrations of BPs in different thermal paper brands

| Thermal Paper Brands  | Statistic Parameters | BPA     | BPB   | BPS    | BPAF | BPZ  | BPF  | BPP  |
|-----------------------|----------------------|---------|-------|--------|------|------|------|------|
| <b>Brand f (n:31)</b> | Min                  | 3.42    | 9.98  | 0.07   | nc   | 0.74 | 3.78 | 1.34 |
|                       | Max                  | 692.09  | 61.71 | 1.28   |      | 0.87 | 5.62 | 1.43 |
|                       | Avg                  | 356.68  | 25.89 | 0.27   |      | 0.82 | 4.30 | 1.39 |
|                       | Median               | 375.92  | 21.84 | 0.19   |      | 0.83 | 4.18 | 1.39 |
|                       | GeoAvg               | 218.55  | 23.04 | 0.20   |      | 0.82 | 4.29 | 1.39 |
|                       | SE                   | 31.83   | 2.50  | 0.05   |      | 0.01 | 0.07 | 0.01 |
|                       | 25 th Percentile     | 338.90  | 16.70 | 0.11   |      | 0.80 | 4.05 | 1.36 |
|                       | 75 th Percentile     | 420.07  | 30.61 | 0.29   |      | 0.85 | 4.50 | 1.41 |
| <b>Brand g (n:13)</b> | Min                  | 292.58  | 9.98  | 0.11   | nc   | 0.76 | 3.71 | nc   |
|                       | Max                  | 1061.11 | 51.56 | 2.08   |      | 0.85 | 4.59 |      |
|                       | Avg                  | 457.41  | 24.41 | 0.44   |      | 0.82 | 4.23 |      |
|                       | Median               | 400.99  | 16.25 | 0.24   |      | 0.84 | 4.34 |      |
|                       | GeoAvg               | 428.54  | 21.95 | 0.28   |      | 0.82 | 4.22 |      |
|                       | SE                   | 56.40   | 3.50  | 0.16   |      | 0.01 | 0.10 |      |
|                       | 25 th Percentile     | 349.89  | 15.52 | 0.19   |      | 0.83 | 4.01 |      |
|                       | 75 th Percentile     | 479.21  | 31.88 | 0.35   |      | 0.85 | 4.46 |      |
| <b>Brand h (n:5)</b>  | Min                  | 4.36    | 19.37 | 0.10   | nc   | nc   | 3.95 | nc   |
|                       | Max                  | 490.20  | 46.50 | 200.43 |      |      | 4.57 |      |
|                       | Avg                  | 278.67  | 29.75 | 40.37  |      |      | 4.28 |      |
|                       | Median               | 441.47  | 23.37 | 0.40   |      |      | 4.31 |      |
|                       | GeoAvg               | 76.71   | 27.61 | 0.92   |      |      | 4.27 |      |
|                       | SE                   | 112.0   | 6.55  | 40.01  |      |      | 0.14 |      |
|                       | 25 th Percentile     | 6.24    | 21.37 | 0.10   |      |      | 4.13 |      |
|                       | 75 th Percentile     | 451.10  | 34.94 | 0.82   |      |      | 4.44 |      |
| <b>Brand i (n:7)</b>  | Min                  | 2.89    | nc    | 0.15   | nc   | nc   | nc   | nc   |
|                       | Max                  | 514.08  |       | 210.28 |      |      |      |      |
|                       | Avg                  | 184.60  |       | 95.92  |      |      |      |      |
|                       | Median               | 5.04    |       | 114.93 |      |      |      |      |
|                       | GeoAvg               | 27.06   |       | 8.41   |      |      |      |      |
|                       | SE                   | 87.0    |       | 35.45  |      |      |      |      |
|                       | 25 th Percentile     | 3.12    |       | 0.17   |      |      |      |      |
|                       | 75 th Percentile     | 381.98  |       | 172.87 |      |      |      |      |
| <b>Brand j (n:10)</b> | Min                  | 3.34    | nc    | 0.09   | nc   | nc   | nc   | nc   |
|                       | Max                  | 431.45  |       | 207.59 |      |      |      |      |
|                       | Avg                  | 81.49   |       | 154.06 |      |      |      |      |
|                       | Median               | 192.47  |       | 57.56  |      |      |      |      |
|                       | GeoAvg               | 10.06   |       | 44.17  |      |      |      |      |
|                       | SE                   | 52.0    |       | 25.77  |      |      |      |      |
|                       | 25 th Percentile     | 3.76    |       | 180.71 |      |      |      |      |
|                       | 75 th Percentile     | 5.32    |       | 196.10 |      |      |      |      |

nc: not calculated as the compound was not found in any of the samples of the relevant brand

**Table S6.** Concentrations of the BP-A, BP-B and BP-S ( $\mu\text{g/g}$  paper) in thermal paper receipts by service group

| Consumption              | n  | $\mu\text{g/g}$ paper |                   |        |      |             |                  |        |      |             |                  |        |      |
|--------------------------|----|-----------------------|-------------------|--------|------|-------------|------------------|--------|------|-------------|------------------|--------|------|
|                          |    | BPA                   |                   |        |      | BPB         |                  |        |      | BPS         |                  |        |      |
|                          |    | Range                 | Mean $\pm$ SE     | Median | % DF | Range       | Mean $\pm$ SE    | Median | % DF | Range       | Mean $\pm$ SE    | Median | % DF |
| Fuel Bill                | 8  | 8.33-479.21           | 305.0 $\pm$ 66.4  | 374.87 | 100  | 21.37-53.14 | 42.1 $\pm$ 4.3   | 44.49  | 75   | 0.11-208.72 | 50.2 $\pm$ 32.5  | 0.48   | 100  |
| Cafe-Restaurant          | 3  | 5.57-318.08           | 157.5 $\pm$ 101   | 153.25 | 100  | 12.70-17.64 | 15.1 $\pm$ 2     | 15.17  | 50   | 0.07-185.39 | 46.5 $\pm$ 53.4  | 0.39   | 100  |
| Cinema                   | 3  | 372.74-418.87         | 398.4 $\pm$ 13.5  | 403.61 | 100  | 13.58-17.16 | 15.6 $\pm$ 1     | 16.20  | 100  | 0.07-0.09   | 0.08 $\pm$ 0.005 | 0.08   | 100  |
| Fast food                | 45 | 1.98-1061.11          | 394 $\pm$ 35.8    | 427.74 | 100  | 12.17-60.53 | 25.08 $\pm$ 2    | 19,89  | 82   | 0.10-207.59 | 35.3 $\pm$ 11    | 0.21   | 100  |
| Gas station              | 22 | 6.24-728.24           | 397.4 $\pm$ 36.6  | 400.11 | 95   | 9.76-51.56  | 22.05 $\pm$ 2.25 | 20.69  | 82   | 0.08-0.82   | 0.22 $\pm$ 0.04  | 0.18   | 100  |
| Self-pay machine receipt | 10 | 3.42-461.74           | 259.9 $\pm$ 55.1  | 340.75 | 100  | 3.65-61.71  | 29.4 $\pm$ 5.8   | 30.30  | 80   | 0.08-182.86 | 35.38 $\pm$ 23.4 | 0.22   | 100  |
| Supermarket              | 29 | 2.89-711.72           | 278.7 $\pm$ 43.1  | 350.78 | 100  | 3.73-39.11  | 19.4 $\pm$ 1.7   | 17.36  | 66   | 0.08-210.28 | 62.2 $\pm$ 16.4  | 0.22   | 100  |
| Health Center            | 3  | 4.36-553.47           | 342.6 $\pm$ 170.8 | 470.01 | 100  | 16.85-26.19 | 21.5 $\pm$ 3.9   | 21.52  | 95   | 0.20-200.43 | 67 $\pm$ 66.74   | 0.23   | 100  |
| Apparel                  | 9  | 3.95-829.60           | 416.3 $\pm$ 72.6  | 389.08 | 100  | 13,31-23.48 | 18.7 $\pm$ 1     | 19.18  | 95   | 0,10-181.79 | 20.4 $\pm$ 20.2  | 0.30   | 100  |
| Other*                   | 19 | 4.36-847.86           | 430.5 $\pm$ 32.0  | 418.69 | 100  | 15.07-29.88 | 19.7 $\pm$ 1.6   | 20.11  | 95   | 0.08-0.25   | 0.25 $\pm$ 0.06  | 0.15   | 100  |

\*Copy center, cosmetics, educational charge, hardware store and post-office, DF: Detection Frequency, SE: Standard Error

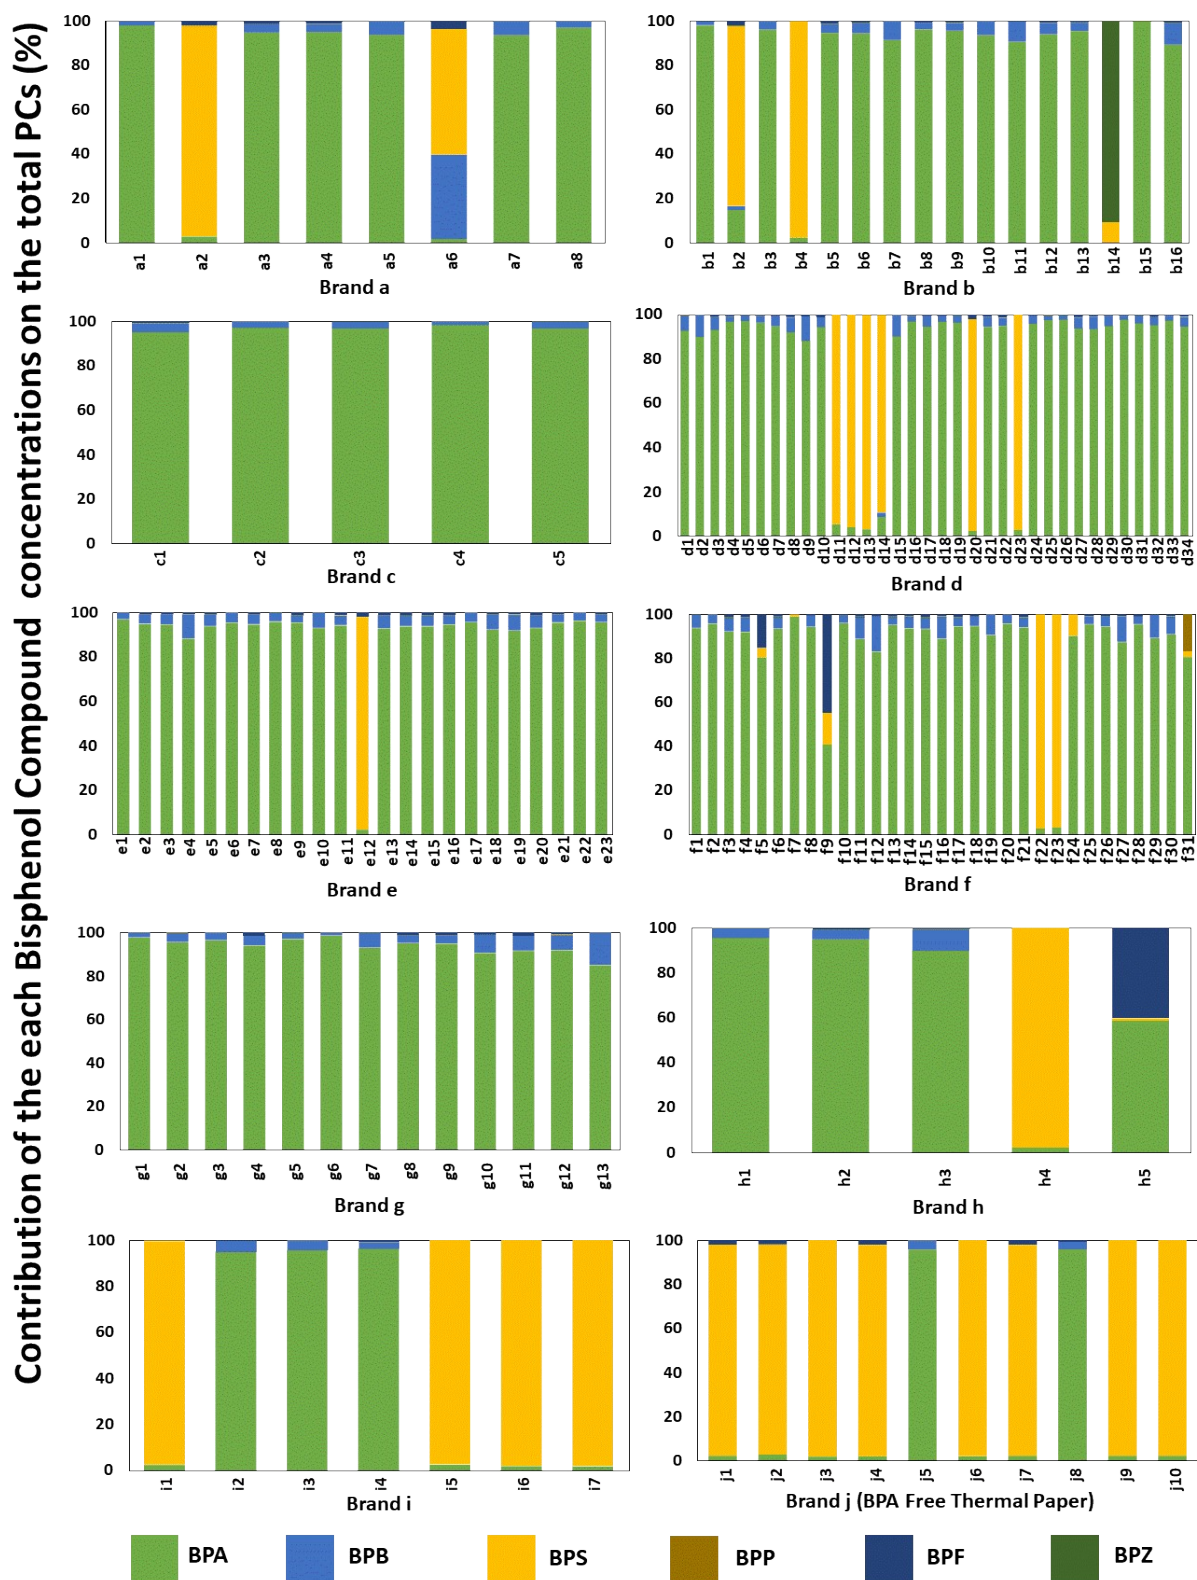

**Figure S1.** Contribution of each bisphenol compound to total concentration in different brand receipt papers

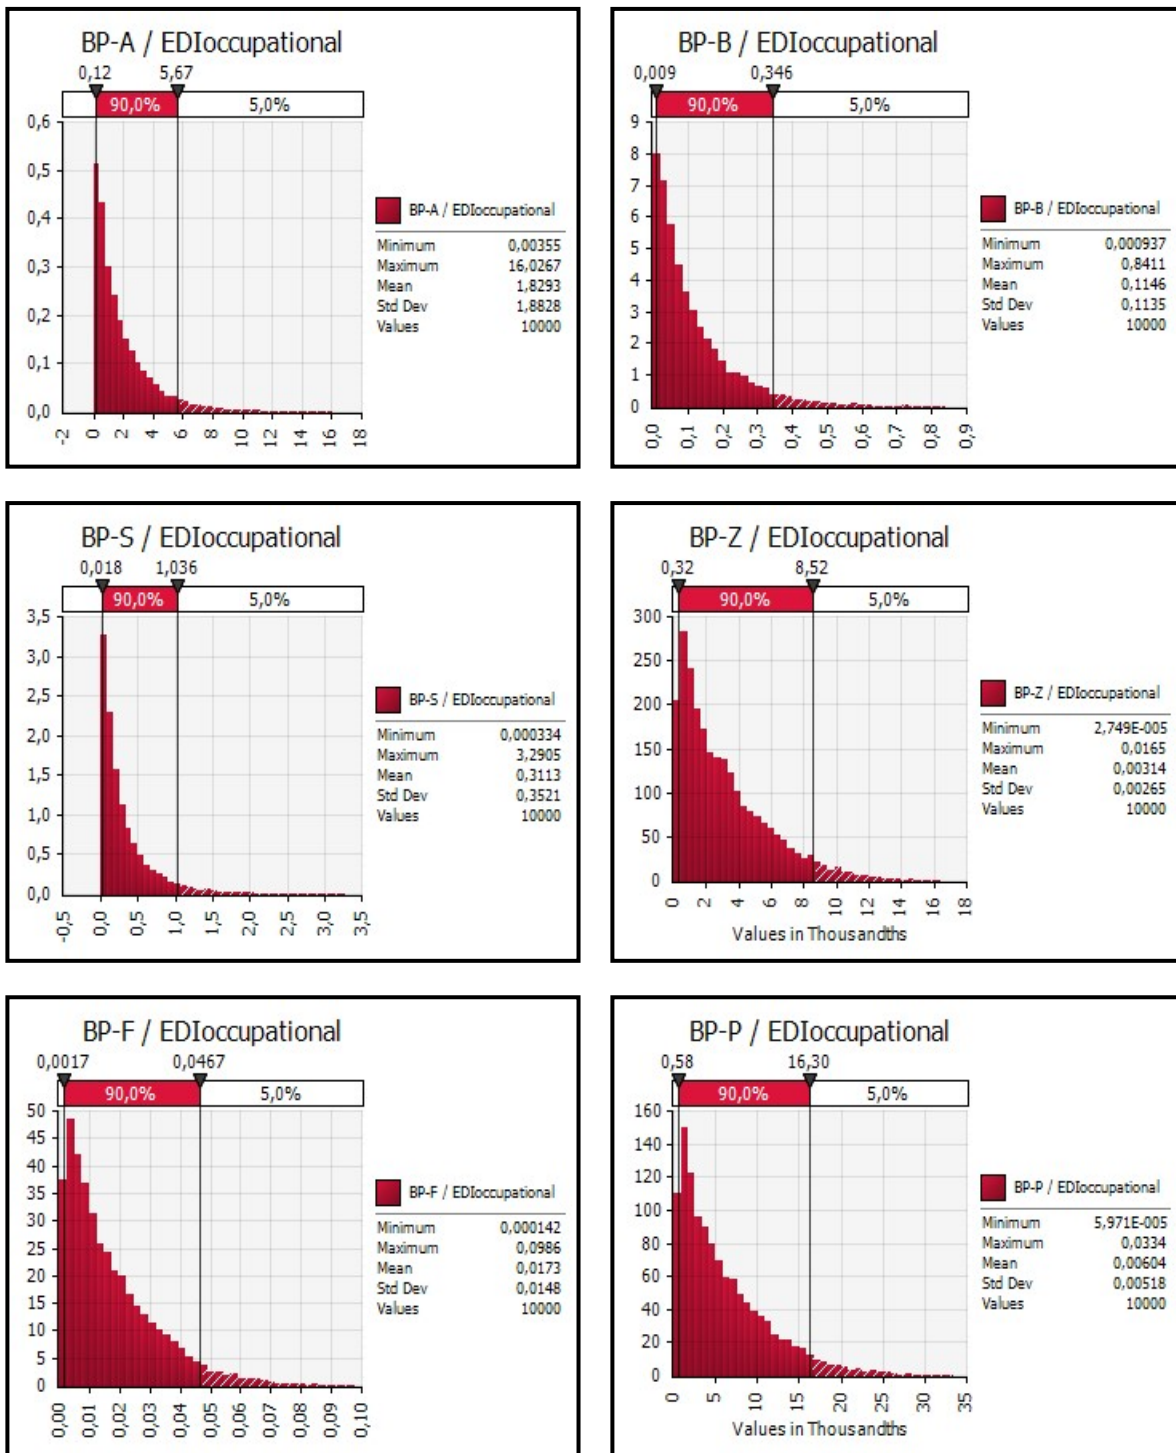

**Figure S2.** The estimated daily intake (EDI) of BPs for probabilistic calculation in occupational exposure groups

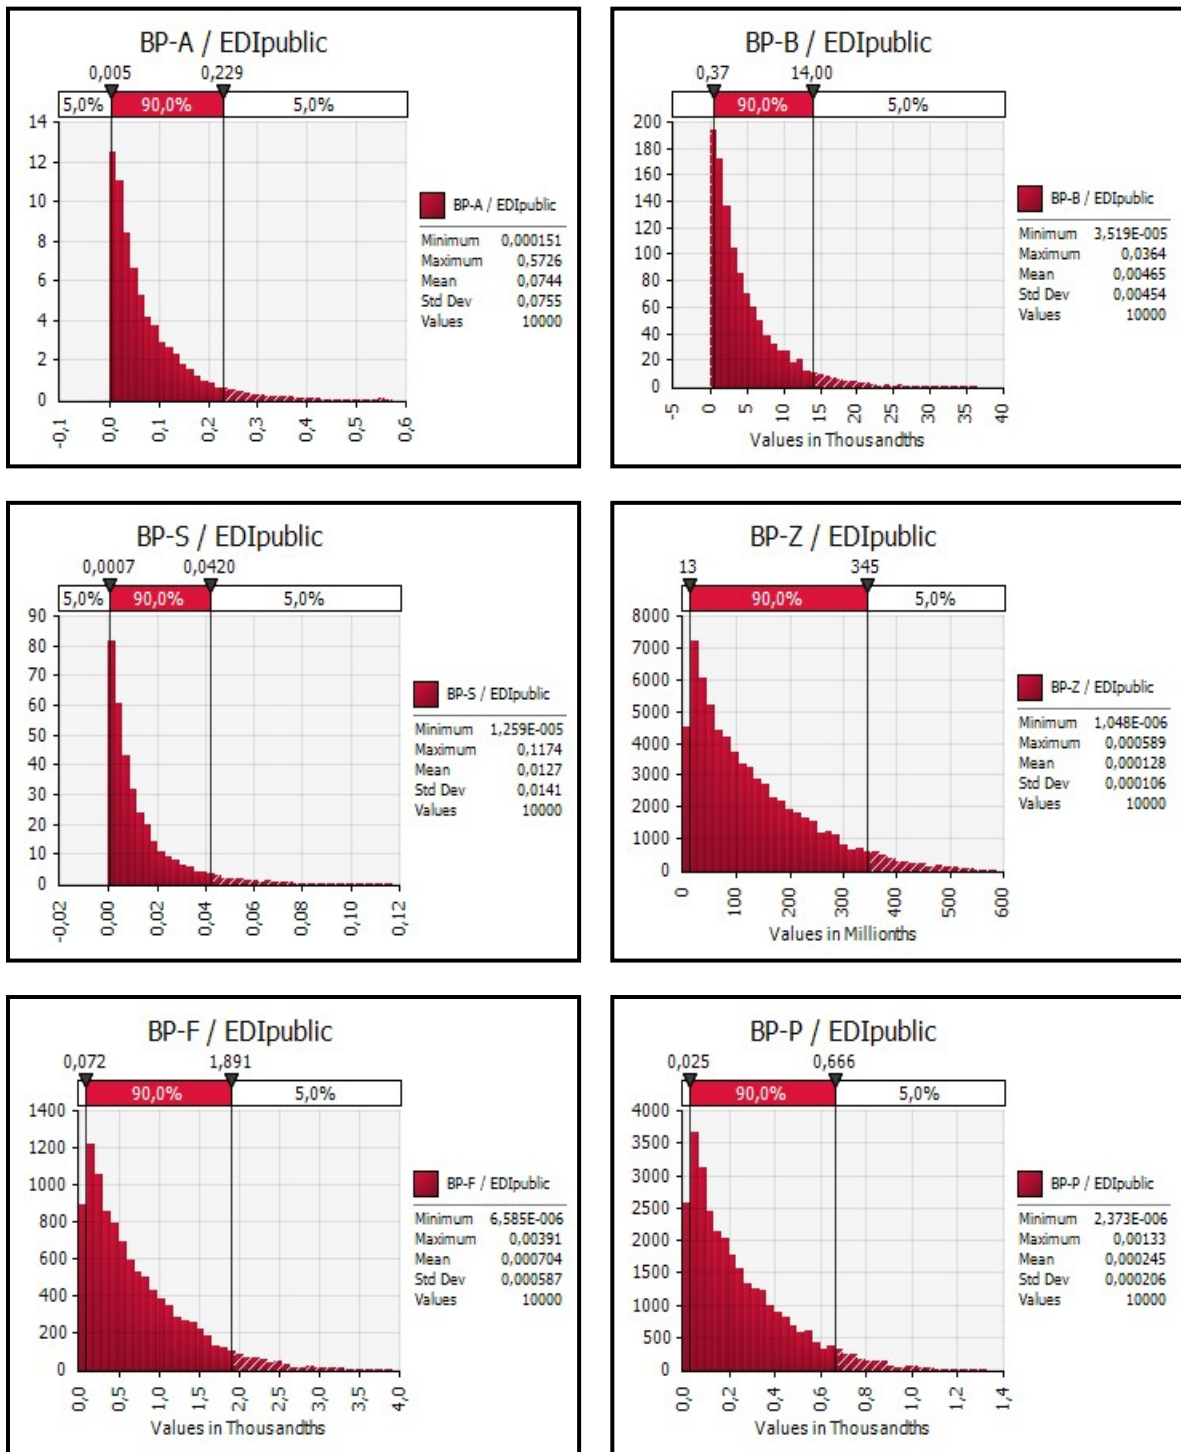

**Figure S3.** The estimated daily intake (EDI) of BPs for probabilistic calculation in public exposure groups



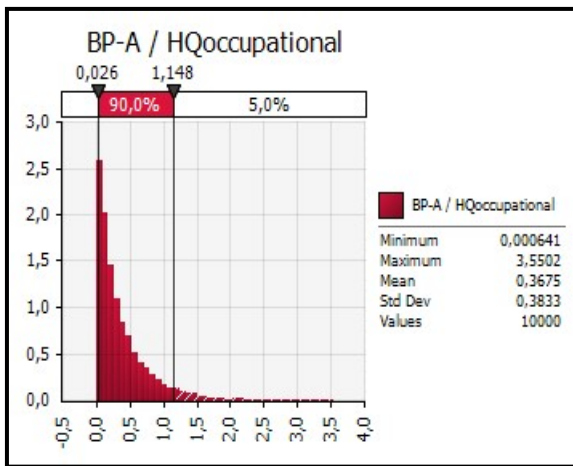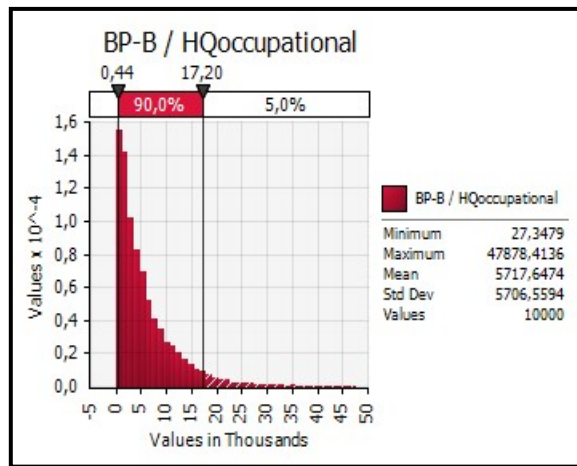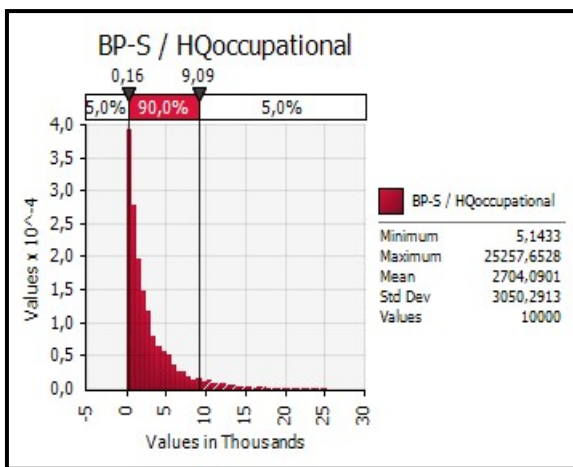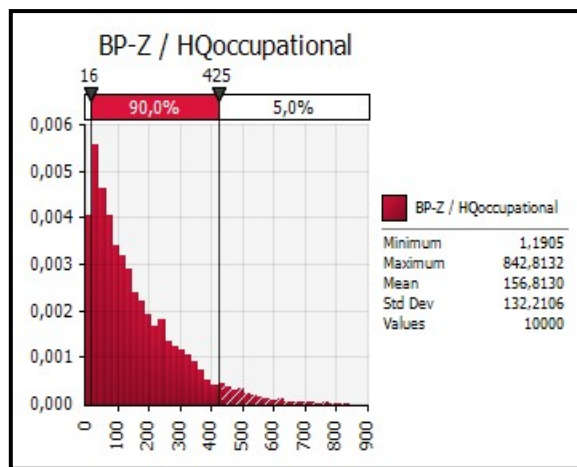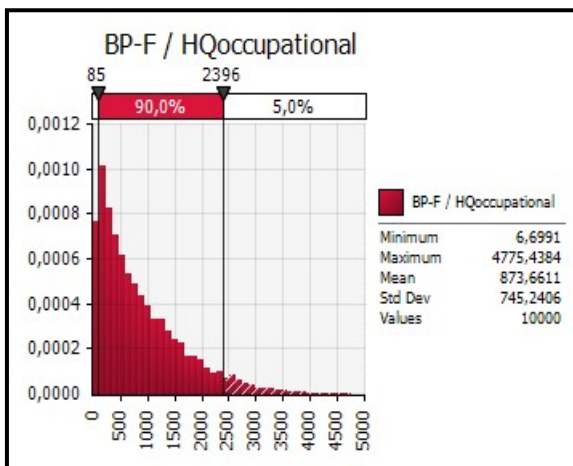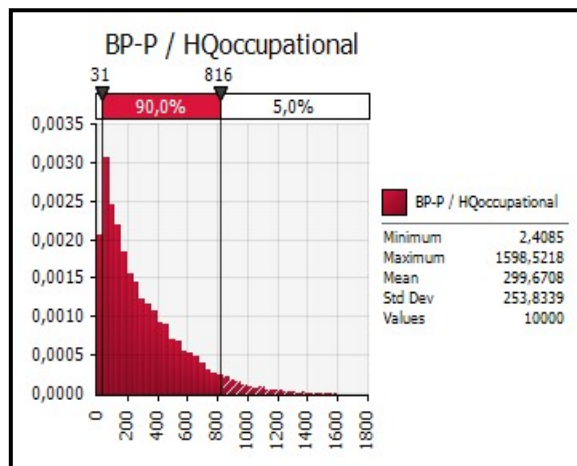

**Figure S4.** The hazard quotient (HQ) of BPs for probabilistic calculation in occupational exposure groups



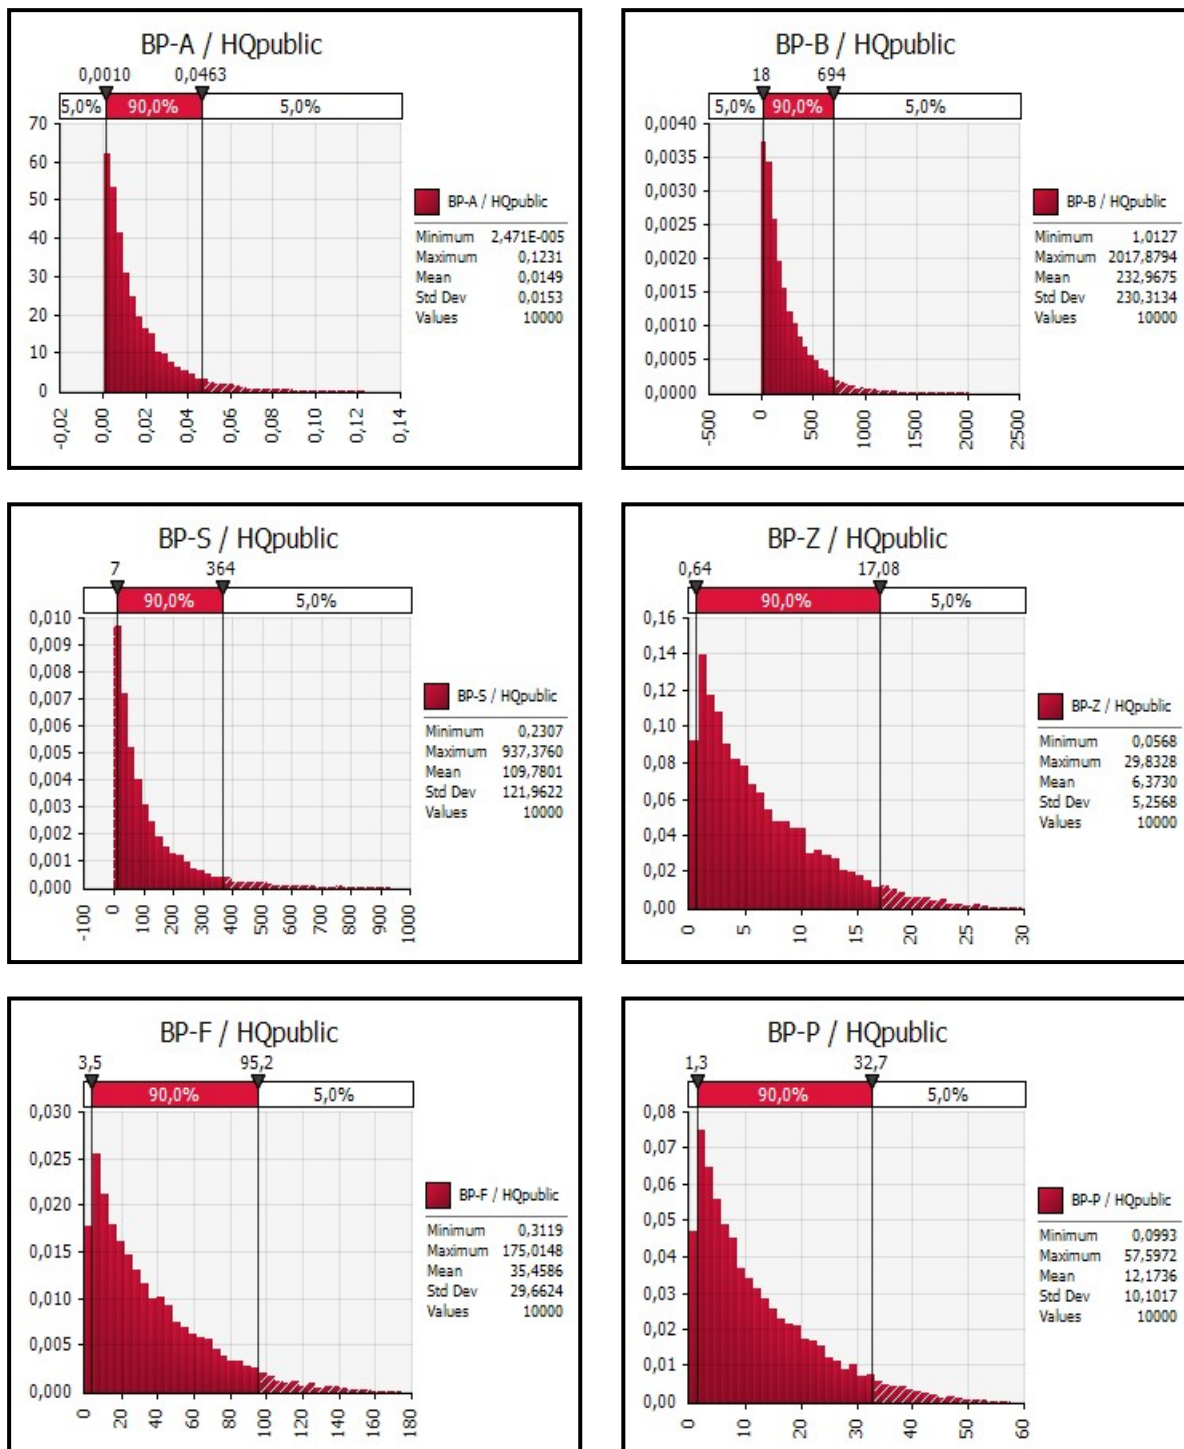

**Figure S5.** The hazard quotient (HQ) of BPs for probabilistic calculation in public exposure groups

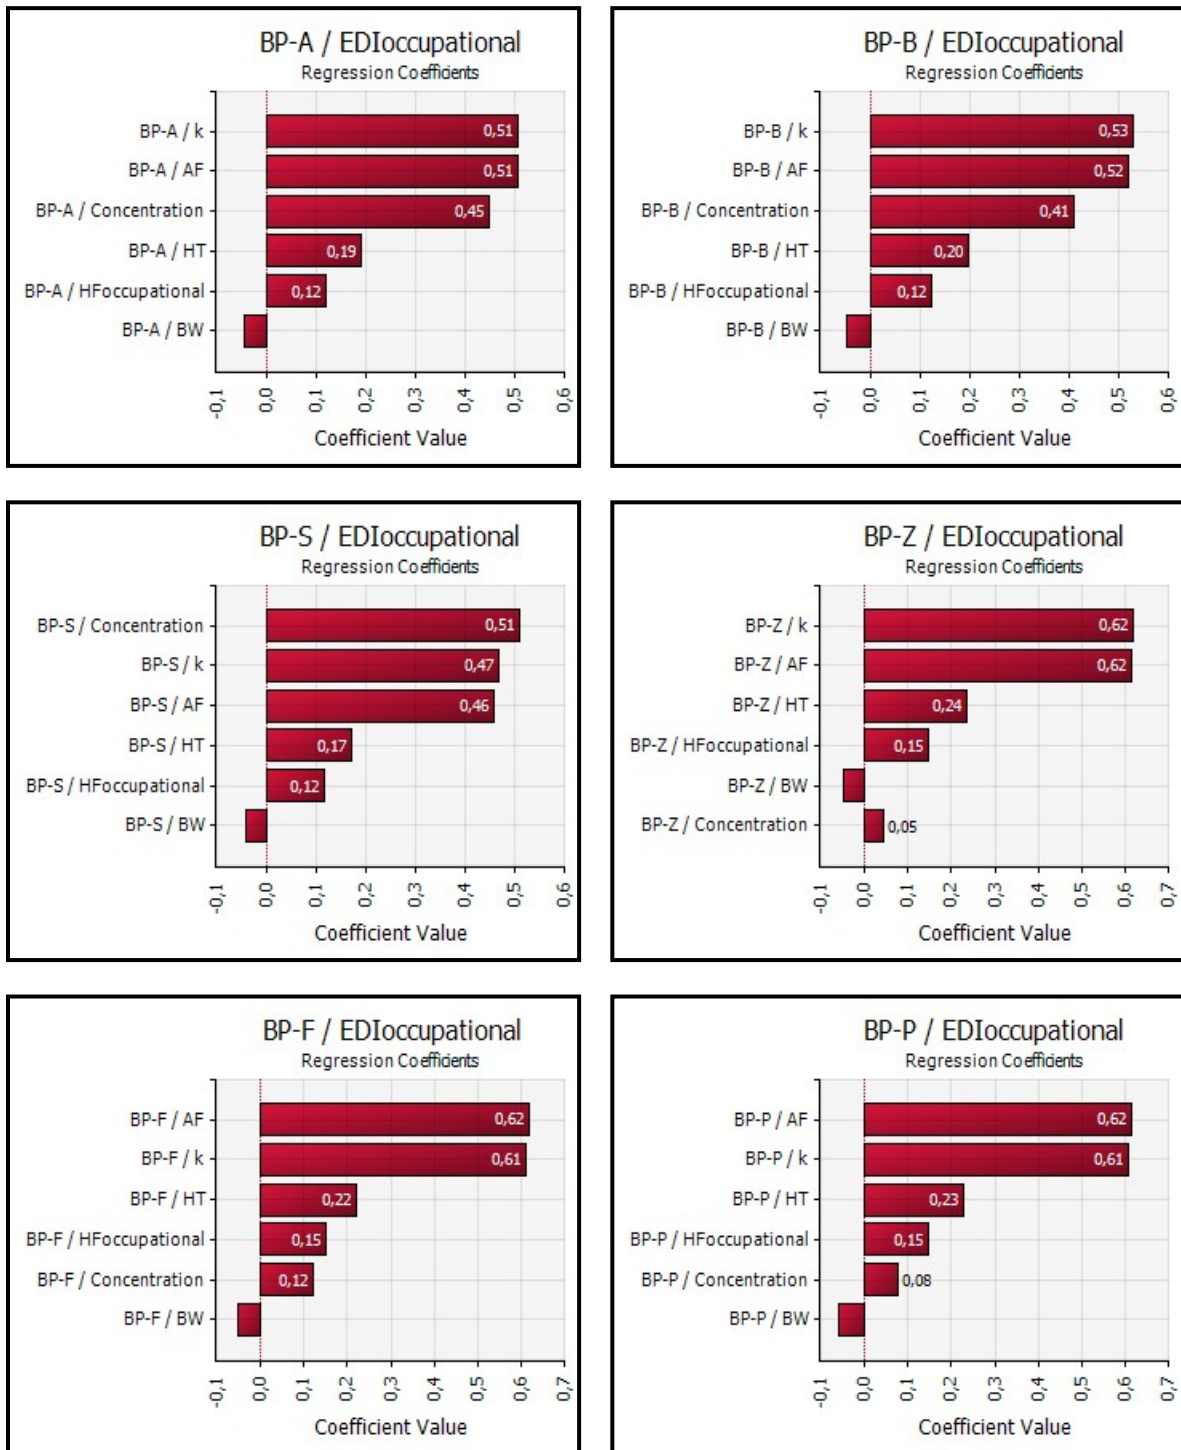

**Figure S6.** Sensitivity analysis of estimated daily intake (EDI) for BPs in occupational exposure groups

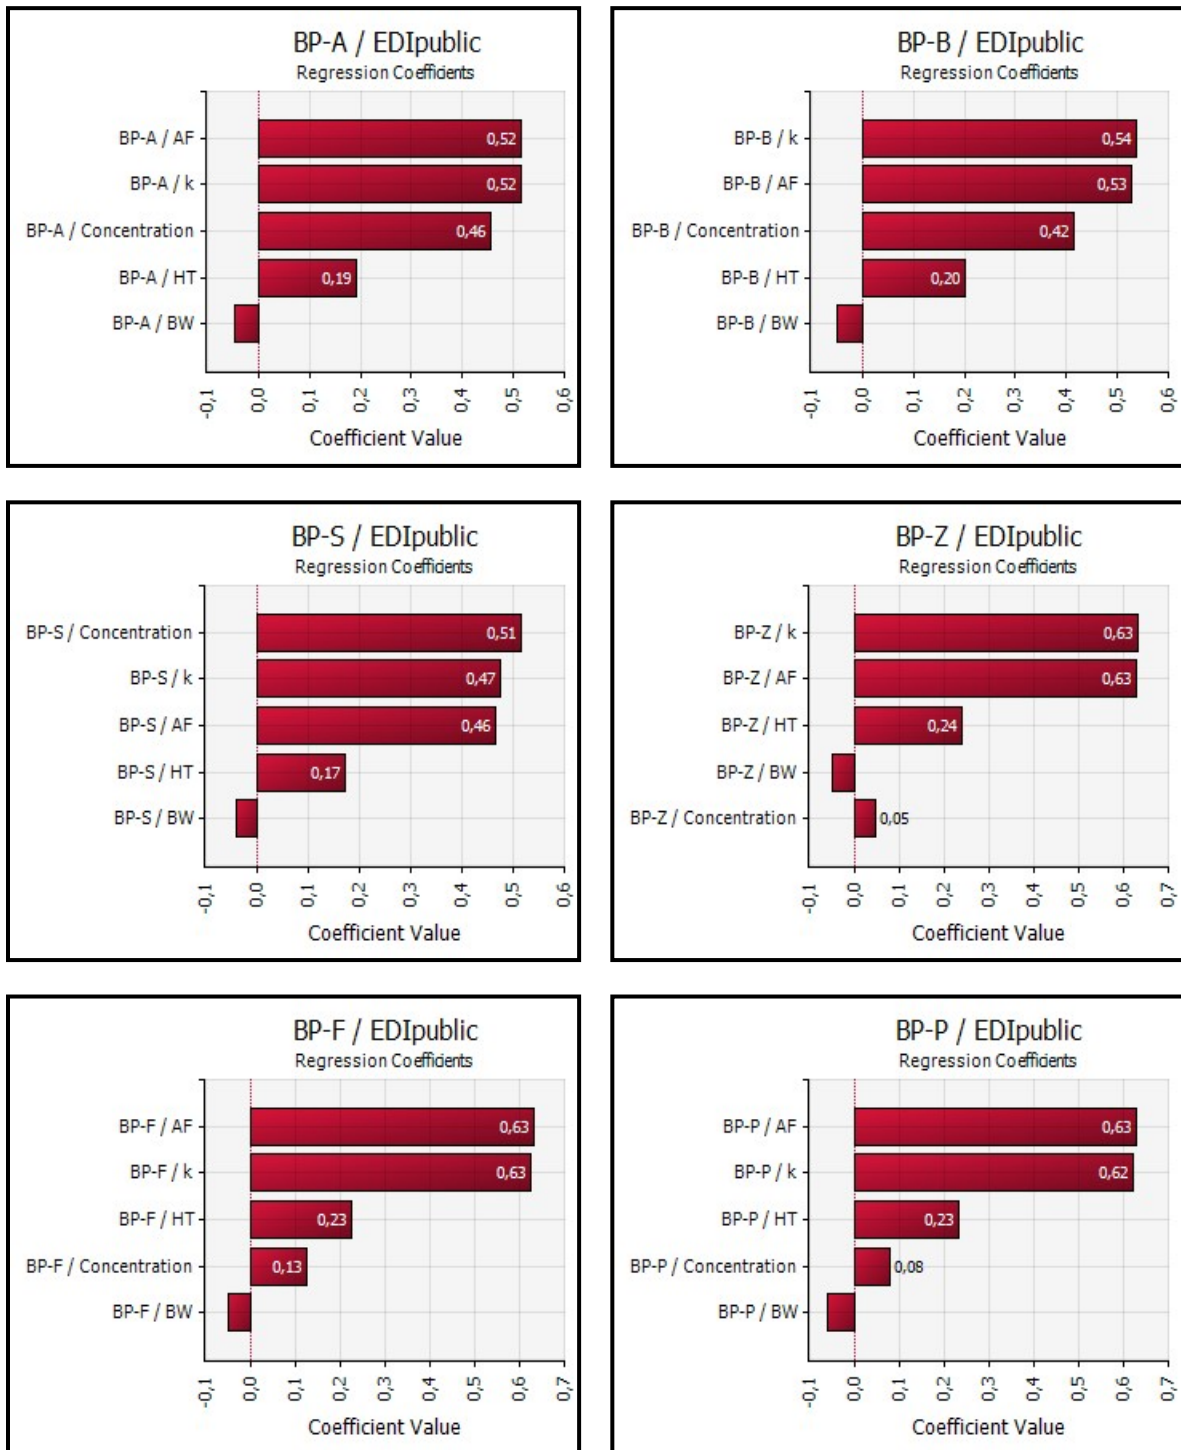

**Figure S7.** Sensitivity analysis of estimated daily intake (EDI) for BPs in public exposure groups

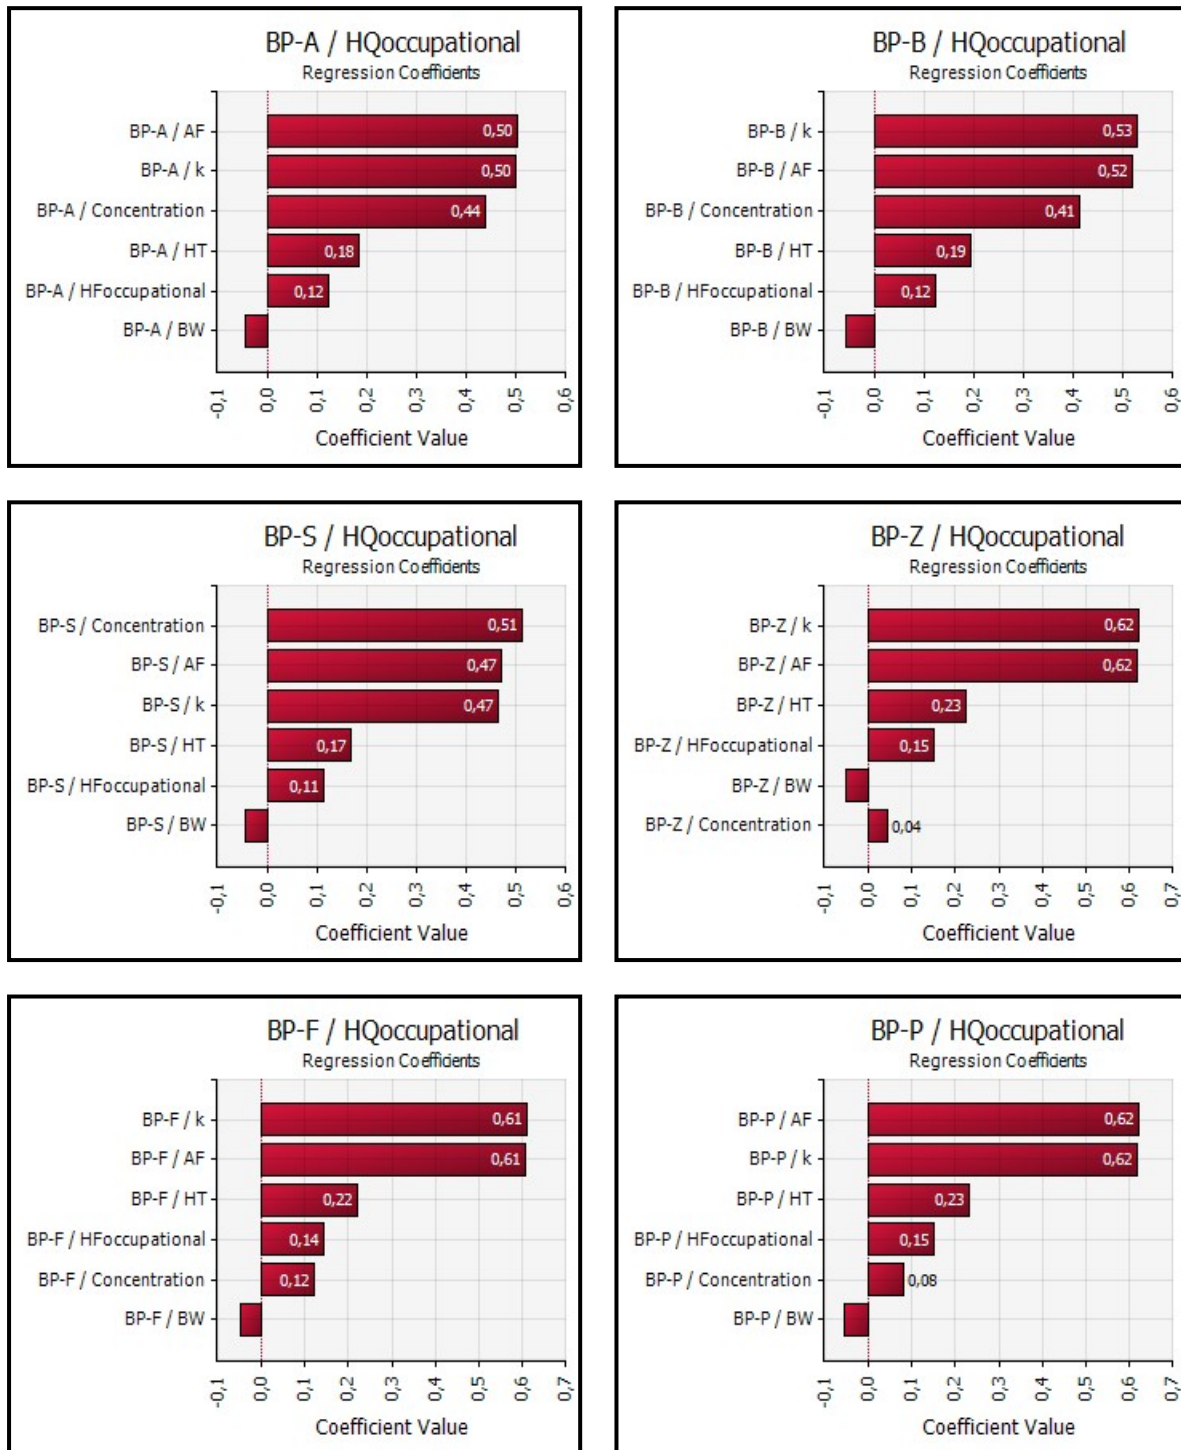

**Figure S8.** Sensitivity analysis of hazard quotient (HQ) for BPs in occupational exposure groups

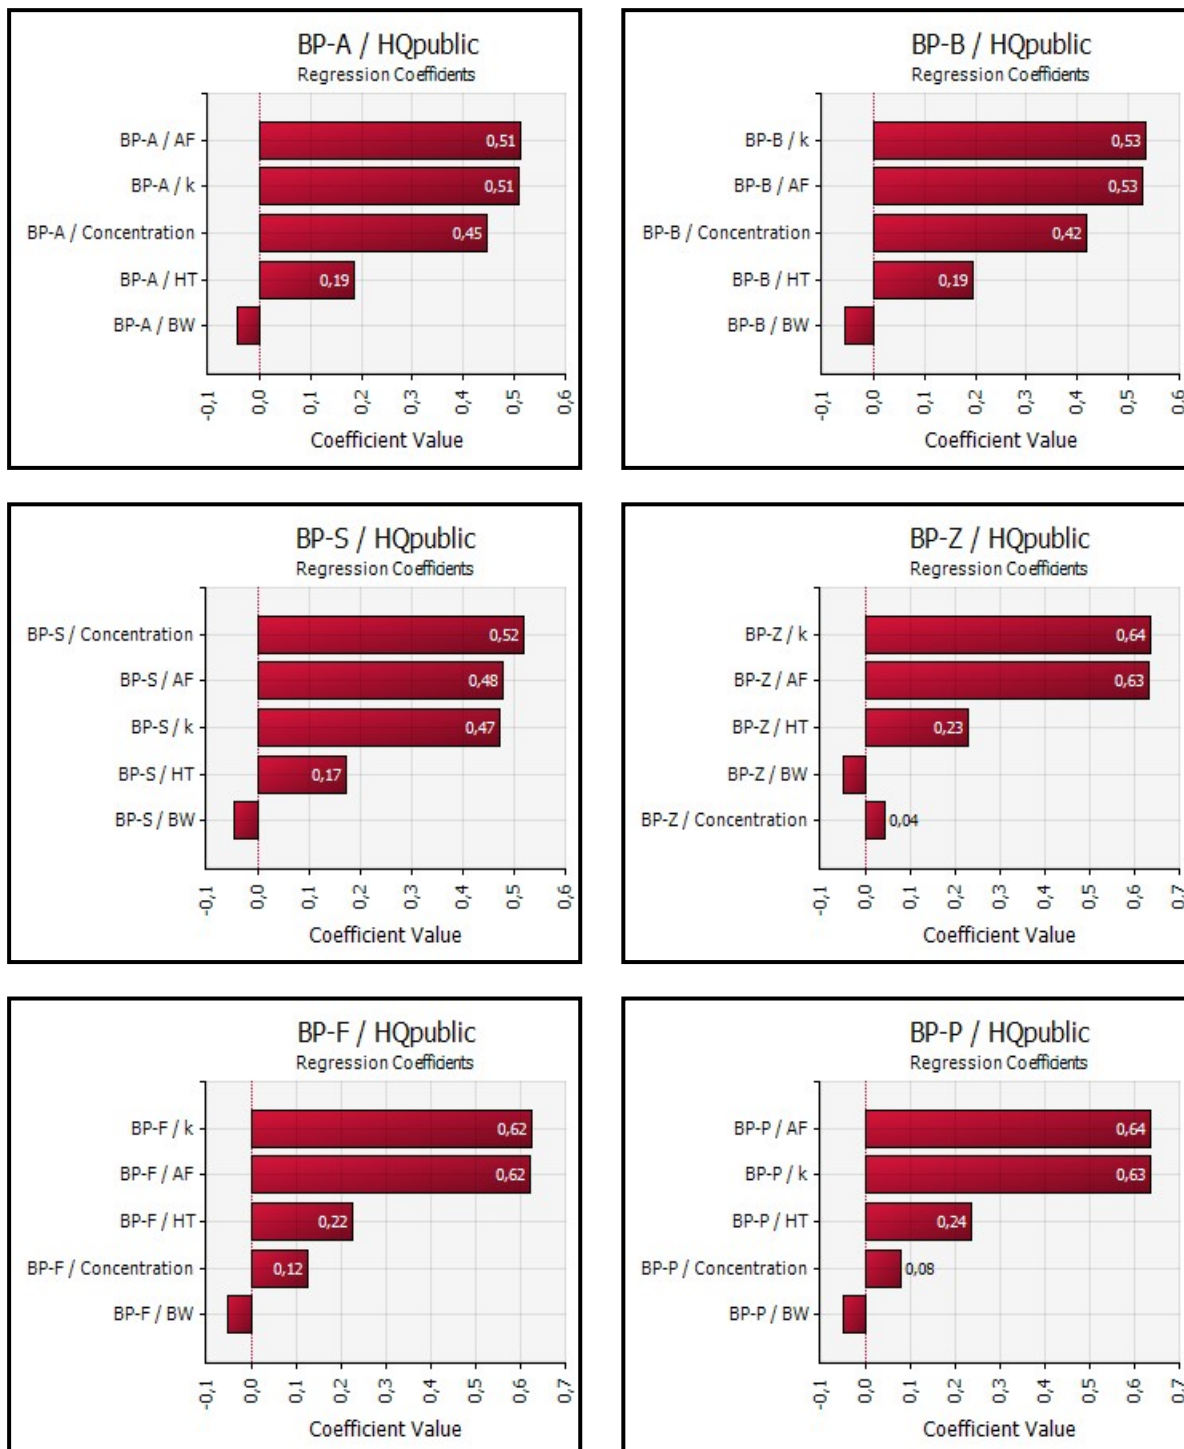

**Figure S9.** Sensitivity analysis of hazard quotient (HQ) for BPs in public exposure groups



## REFERENCES

- 1 A. M. Hormann, F. S. vom Saal, S. C. Nagel, R. W. Stahlhut, C. L. Moyer, M. R. Ellersieck, W. V. Welshons, P. L. Toutain and J. A. Taylor, Holding Thermal Receipt Paper and Eating Food after Using Hand Sanitizer Results in High Serum Bioactive and Urine Total Levels of Bisphenol A (BPA), *Plos One*, 2014, **9**.
- 2 S. Biedermann, P. Tschudin and K. Grob, Transfer of bisphenol A from thermal printer paper to the skin, *Analytical and Bioanalytical Chemistry*, 2010, **398**, 571-576.
- 3 A. L. Demierre, R. Peter, A. Oberli and M. Bourqui-Pittet, Dermal penetration of bisphenol A in human skin contributes marginally to total exposure, *Toxicol Lett*, 2012, **213**, 305-308.
- 4 D. Zalko, C. Jacques, H. Duplan, S. Bruel and E. Perdu, Viable skin efficiently absorbs and metabolizes bisphenol A, *Chemosphere*, 2011, **82**, 424-430.
- 5 B. A. Rocha, L. F. Azevedo, M. Gallimberti, A. D. Campiglia and F. Barbosa, High levels of bisphenol a and bisphenol s in brazilian thermal paper receipts and estimation of daily exposure, *Journal of Toxicology and Environmental Health-Part a-Current Issues*, 2015, **78**, 1181-1188.
- 6 L. Semerjian, N. Alawadhi and K. Nazer, Detection of bisphenol A in thermal paper receipts and assessment of human exposure: A case study from Sharjah, United Arab Emirates, *Plos One*, 2023, **18**.
- 7 S. Y. Lu, W. J. Chang, S. O. Sojinu and H. G. Ni, Bisphenol A in supermarket receipts and its exposure to human in Shenzhen, China, *Chemosphere*, 2013, **92**, 1190-1194.
- 8 R. F. Fan, B. Y. Zeng, X. S. Liu, C. Chen, Q. W. Zhuang, Y. J. Wang, M. L. Hu, Y. S. Lv, J. N. Li, Y. X. Zhou and Z. Y. W. Lin, Levels of bisphenol-A in different paper products in Guangzhou, China, and assessment of human exposure via dermal contact, *Environmental Science-Processes & Impacts*, 2015, **17**, 667-673.
- 9 EC, European Commission, Technical Guidance Document on Risk Assessment Part 1., *Institute for Health and Consumer Protection*, 2003.
- 10 USEPA, *USEPA Integrated Risk Information System (IRIS) database*, 2024.
- 11 EFSA, *EFSA CEF Panel (EFSA Panel on Food Contact Materials, Enzymes, Flavourings and Processing Aids). Re-evaluation of the risks to public health related to the presence of bisphenol A (BPA) in foodstuffs.*, Report, EFSA Journal 2023.
- 12 K. Jurowski and M. Krośniak, The Toxicological Risk Assessment of Dermal Exposure of Patients Exposed to Lead and Cadmium Due to Application of Ointments with Marjoram Herb Extract (*Majoranae herbae extractum*), *International journal of environmental research and public health*, 2023, **20**.
- 13 EFSA EFSA Journal, 2579, *Guidance on selected default values to 49 be used by the EFSA Scientific Committee, Scientific Panels and Units in the absence of actual 50 measured data*, 2012.
- 14 EC, *European Comission, OPINION ON the safety of presence of Bisphenol A in clothing articles, SCCS/1620/20*, Scientific Committee on Consumer Safety, 2020.
- 15 V. Gayrard, M. Z. Lacroix, S. H. Collet, C. Viguié, A. Bousquet-Melou, P. L. Toutain and N. Picard-Hagen, High bioavailability of bisphenol A from sublingual exposure, *Environmental health perspectives*, 2013, **121**, 951-956.
